# Supplementary material for: Sexual selection theory meets disease vector control: Testing harmonic convergence as a “good genes” signal in Aedes aegypti mosquitoes
Source: PLoS Negl Trop Dis. 2021 Jul 2;15(7):e0009540. doi: 10.1371/journal.pntd.0009540 (PMC8282061; doi:10.1371/journal.pntd.0009540)
Supplement: S1 Table — Daughter life table analysis data presented by parental convergence status and experimental trial (individually and averaged). Although the effect of parental convergence status on R0 and r (but not Tc) are inconsistent across two experimental trials, the average effect was similar. Abbreviations: R0, cumulative reproductive rate; Tc, generation time; r, intrinsic rate of increase. (XLSX) [file pntd.0009540.s011.xlsx]

## Sheet: Sheet1
	Experimental trial	Parental convergence status	N	R0	Tc	r
	1	Converged	24	118.604	14.1544	0.494
		Non-converged	74	90.8153	15.1172	0.4504
	2	Converged	52	108.385	14.5595	0.4516
		Non-converged	57	123.921	14.6284	0.4676
	Average	Converged	76	113.494	14.357	0.4728
		Non-converged	131	107.368	14.8728	0.459
